# Supplementary material
Source: PubMed Central journal article supplement (PMC137123)
Supplement: nar_30_20_4452__1.pdf [file nar_30_20_4452__1.pdf]

## Supplementary Material

**Table S1.** <sup>1</sup>H, <sup>31</sup>P chemical shifts (ppm) of the 16M2, at 35 °C. na no resonance assigned.

|     | H8   | H6   | H5   | H2   | H1'  | H2'  | H2'' | H3'  | H4'  | H5'  | H5'' | 31P   |
|-----|------|------|------|------|------|------|------|------|------|------|------|-------|
| 1C  |      | 7.78 | 5.88 |      | 5.84 | 2.13 | 2.51 | 4.64 | 4.05 | 3.74 |      | -4.28 |
| 2T  |      | 7.51 | 1.71 |      | 5.63 | 2.14 | 2.42 | 4.86 | 4.15 | 4.02 | na   | -4.23 |
| 3A  | 8.19 |      |      | 7.47 | 5.98 | 2.68 | 2.83 | 5.02 | 4.37 | 4.12 | 4.15 | -4.25 |
| 4G  | 7.59 |      |      |      | 5.49 | 2.47 | 2.61 | 4.93 | 4.32 | 4.13 | 4.17 | -4.10 |
| 5G  | 7.53 |      |      |      | 5.64 | 2.47 | 2.65 | 4.93 | 4.31 | 4.10 | 4.13 | -4.26 |
| 6G  | 7.55 |      |      |      | 5.52 | 2.46 | 2.64 | 4.94 | 4.30 | 4.13 |      | -4.19 |
| 7A  | 8.08 |      |      | 7.84 | 6.17 | 2.63 | 2.86 | 4.99 | 4.43 | 4.20 | 4.28 | -4.12 |
| 8C  |      | 7.21 | 5.14 |      | 5.77 | 1.94 | 2.48 | 4.64 | 4.21 | 4.10 | 4.15 | -4.29 |
| 9T  |      | 7.36 | 1.46 |      | 6.02 | 2.16 | 2.57 | 4.85 | 4.20 |      | 4.12 | -4.43 |
| 10T |      | 7.45 | 1.57 |      | 6.14 | 2.18 | 2.63 | 4.90 | 4.21 | 4.12 | 4.13 | -4.48 |
| 11T |      | 7.42 | 1.63 |      | 6.07 | 2.20 | 2.56 | 4.91 | 4.22 | 4.12 | 4.15 | -4.24 |
| 12C |      | 7.56 | 5.66 |      | 5.94 | 2.23 | 2.48 | 4.84 | 4.15 | 4.05 | 4.13 | -4.17 |
| 13C |      | 7.52 | 5.58 |      | 5.94 | 2.21 | 2.47 | 4.84 | 4.05 | na   | na   | -4.15 |
| 14T |      | 7.52 | 1.71 |      | 5.63 | 2.14 | 2.42 | 4.86 | 4.15 | 4.02 |      | -4.17 |
| 15A | 8.19 |      |      | 7.47 | 5.96 | 2.70 | 2.84 | 5.02 | 4.37 | 4.02 | 4.03 | -4.26 |
| 16G | 7.52 |      |      |      | 5.56 | 2.47 | 2.62 | 4.83 | 4.30 | na   | na   |       |
|     |      |      |      |      |      |      |      |      |      |      |      |       |
| 17C |      | 7.52 | 5.58 |      | 5.86 | 2.06 | 2.42 | 4.83 | 4.13 | 4.05 | 4.09 | -4.38 |
| 18T |      | 7.39 | 1.71 |      | 5.57 | 2.04 | 2.31 | 4.85 | 4.09 | 4.03 |      | -4.18 |
| 19A | 8.19 |      |      | 7.51 | 6.06 | 2.68 | 2.84 | 5.01 | 4.37 | na   | na   | -4.29 |
| 20G | 7.56 |      |      |      | 5.43 | 2.44 | 2.59 | 4.92 | 4.30 | 4.11 | 4.15 | -4.09 |
| 21G | 7.57 |      |      |      | 5.42 | 2.40 | 2.59 | 4.92 | 4.28 | 4.14 | 4.11 | -4.26 |
| 22A | 8.01 |      |      | 7.22 | 5.80 | 2.57 | 2.79 | 5.00 | 4.35 | 4.08 | 4.14 | -4.37 |
| 23A | 7.97 |      |      | 7.13 | 5.82 | 2.55 | 2.80 | 5.01 | 4.39 | 4.17 |      | -4.34 |
| 24A | 7.92 |      |      | 7.36 | 5.95 | 2.59 | 2.78 | 4.98 | 4.43 | 4.19 | 4.22 | -4.12 |
| 25G | 7.34 |      |      |      | 5.77 | 2.35 | 2.64 | 4.78 | 4.36 | na   | na   | -4.52 |
| 26T |      | 7.18 | 1.08 |      | 5.99 | 2.10 | 2.49 | 4.83 | 4.22 | 4.13 | 4.15 | -4.03 |
| 27C |      | 7.53 | 5.57 |      | 5.90 | 2.03 | 2.46 | 4.81 | 4.20 | na   | na   | -4.11 |
| 28C |      | 7.54 | 5.59 |      | 5.98 | 2.21 | 2.49 | 4.82 | 4.15 | na   | na   | -4.11 |
| 29C |      | 7.53 | 5.59 |      | 5.83 | 2.05 | 2.41 | 4.75 | 4.13 | na   | na   | -4.39 |
| 30T |      | 7.38 | 1.69 |      | 5.57 | 2.03 | 2.30 | 4.83 | 4.09 | 4.03 | na   | -4.17 |
| 31A | 8.19 |      |      | 7.51 | 6.05 | 2.68 | 2.83 | 5.02 | 4.37 | 4.02 | 4.12 | -4.12 |
| 32G | 7.68 |      |      |      | 5.99 | 2.28 | 2.42 | 4.61 | 4.23 | 4.11 | 4.15 |       |

<sup>1</sup>H, <sup>31</sup>P chemical shifts (ppm) of the 16M2, at 35 °C.
